# Supplementary material
Source: publisher site journal article supplement (https://www.spandidos-publications.com/5081/downloadSupplementary)

Figure S1. Changes of the NLR value throughout chemotherapy treatment in unresectable GC patients. Fluctuations of pretreatment NLR values in each case were categorized into an (A) NLR-low group and an (B) NLR-high group by 1st-line pretreatment NLR value. Dotted lines denote the patients under treatment at the time of the analysis, and solid lines represent the patients who had no chemotherapy treatment. A red dot or solid line denotes patients with a worse NLR value ( $>3.0$ ) during chemotherapy. A blue dot or solid line indicates patients with a lower NLR value ( $<3.0$ ) throughout chemotherapy. A green dot or solid line denotes patients with a lower NLR value ( $<3.0$ ) during chemotherapy at least once. A black dot or solid line indicates patients with high NLR values ( $>3.0$ ) throughout chemotherapy.

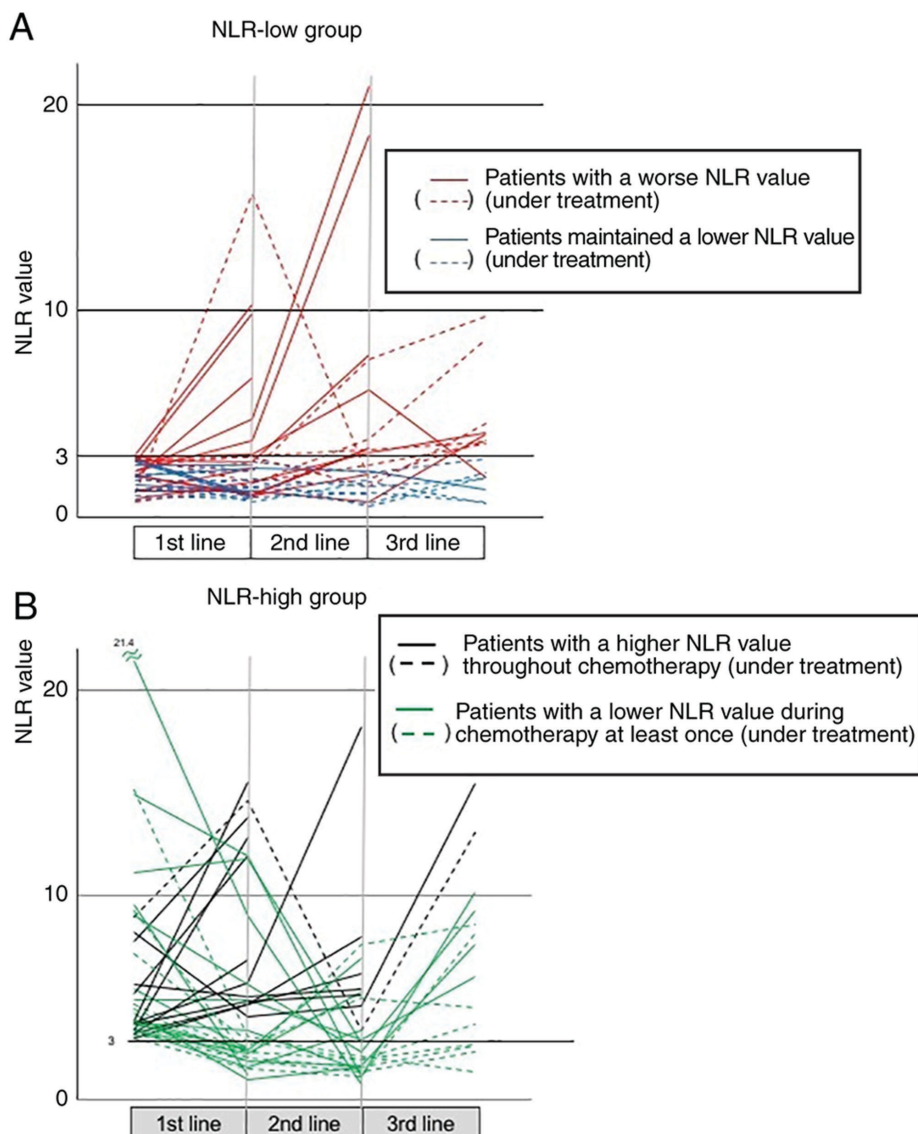

Supplement: Supplementary file 1 [file downloadSupplementary]
